# Supplementary material for: T-DNA alleles of the receptor kinase THESEUS1 with opposing effects on cell wall integrity signaling
Source: PubMed Central journal article supplement (PMC5853656; doi:10.1093/jxb/erx263), 2017-08-01
Supplement: erx263_suppl_supplementary_table_s1_figures_s1_s4.pdf [file erx263_suppl_supplementary_table_s1_figures_s1_s4.pdf]

## SUPPLEMENTARY INFORMATION

### T-DNA alleles of the receptor kinase THESEUS1 with opposing effects on cell wall integrity signaling

David Merz, Julia Richter, Martine Gonneau, Clara Sanchez-Rodriguez, Tobias Eder, Rodney Sormani, Marjolaine Martin, Kian Hématy, Herman Höfte, Marie-Theres Hauser

**Table S1** List of Primers used

| <b>Name</b>            | <b>Sequence</b>               | <b>Specificity</b>                                                                              |
|------------------------|-------------------------------|-------------------------------------------------------------------------------------------------|
| <i>GFP-F</i>           | ACATGAAGCAGCAGCACTTC          | <i>GFP</i> construct                                                                            |
| <i>GFP-R</i>           | TGTAGTTGTACTIONCCAGCTTGT      | <i>GFP</i> construct                                                                            |
| <i>THE1-Start</i>      | ATGGTGTTCACAAAATCATTAC        | ECD-TM <sup>THE1</sup> -YFP construct                                                           |
| <i>TM-JTM-Lo</i>       | GAACCTATTAGTAGCGTCCAT         | ECD-TM <sup>THE1</sup> -YFP construct                                                           |
| <i>THE1_3endF</i>      | AAGGTGAACCCTGCCTCGT           | expression downstream T-DNA insertion                                                           |
| <i>THE1_3endR</i>      | ATTGGAATCCCTGGAATGTGG         | expression downstream T-DNA insertion                                                           |
| <i>THE1_5endF</i>      | GTGGTCTTTGTCAACGCTAT          | expression upstream T-DNA insertion                                                             |
| <i>THE1_5endR</i>      | CATCATTATCCATTGTCTCC          | expression upstream T-DNA insertion                                                             |
| <i>THE1_midF</i>       | GCTGATATCACTAATGCGAC          | upstream T-DNA insertions, <i>the1-3</i> , <i>the1-4</i> genotyping, expression, antisense cDNA |
| <i>THE1_midR2</i>      | CAGCAATCAGCAGAATCAATG         | upstream T-DNA insertions                                                                       |
| <i>LB4</i>             | CGTGTGCCAGGTGCCACGGAATAGT     | <i>the1-3</i> genotyping; T-DNA specific expression                                             |
| <i>LB3</i>             | CTGAATTTTCATAACCAATCTCGATACAC | <i>the1-4</i> genotyping; T-DNA specific expression                                             |
| <i>TUB9-F</i>          | GTACCTTGAAGCTTGCTAATCCTA      | reference gene qPCR                                                                             |
| <i>TUB9-R</i>          | GTTCTGGACGTTTCATCATCTGTTC     | reference gene qPCR                                                                             |
| <i>UBQ-F</i>           | CTCCTTCTTTCTGGTGGTAAACGT      | reference gene qPCR                                                                             |
| <i>UBQ-R</i>           | AACCCTTGAGGTTGAATCATCC        | reference gene qPCR                                                                             |
| <i>5g19110/EDGP-F</i>  | CTACAATGCTCTTGCTCAGTC         | <i>THE1</i> target gene, qPCR                                                                   |
| <i>5g19110/EDGP-R</i>  | ACCGTCGATAAACGCCAAC           | <i>THE1</i> target gene, qPCR                                                                   |
| <i>2g26530/AR781-F</i> | CATCAGCTTGCGTGTCTTGC          | <i>THE1</i> target gene, qPCR                                                                   |
| <i>2g26530/AR781-R</i> | CCCTCTTCCTCGTGAACCTCG         | <i>THE1</i> target gene, qPCR                                                                   |

## Supplementary Figures

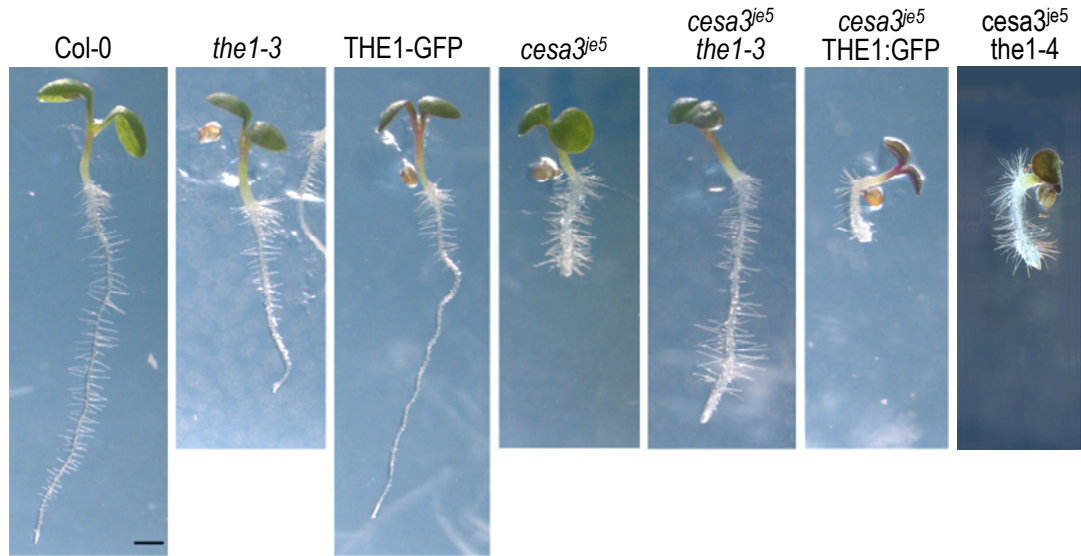

**Figure S1** Root growth of *the1-3*, *the1-4* and 35S::THE1:GFP seedlings in cellulose deficient genetic backgrounds. Black bar corresponds to 1 mm.

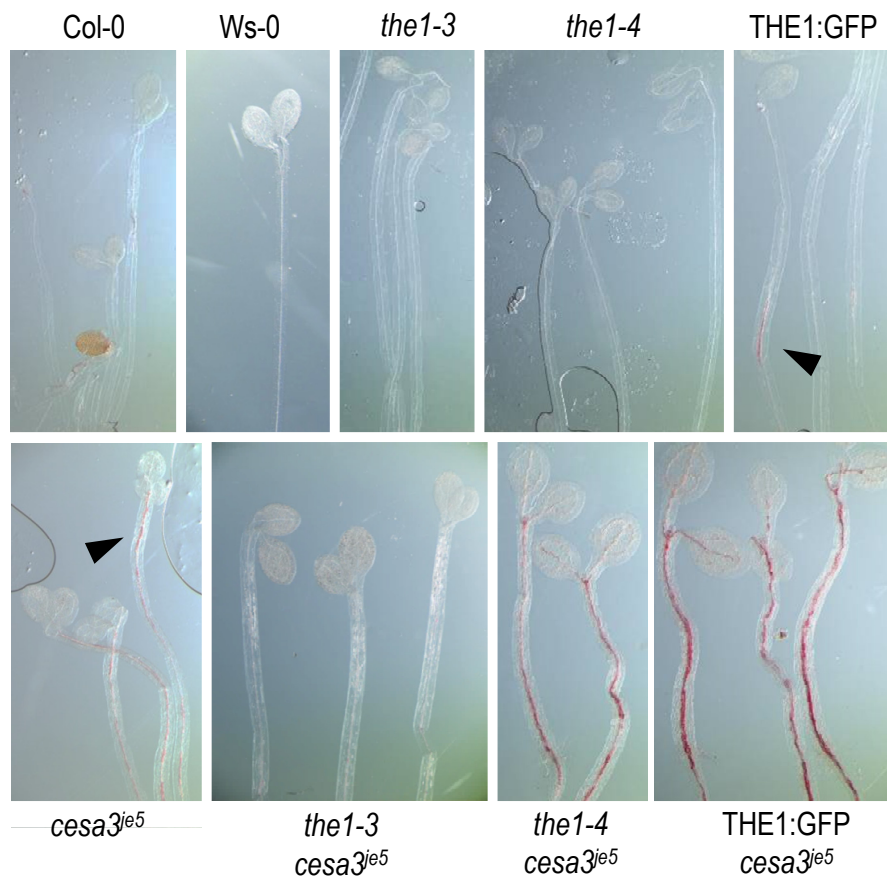

**Figure S2** Ectopic lignification of etiolated seedlings of *the1* alleles in cellulose deficient genetic backgrounds.

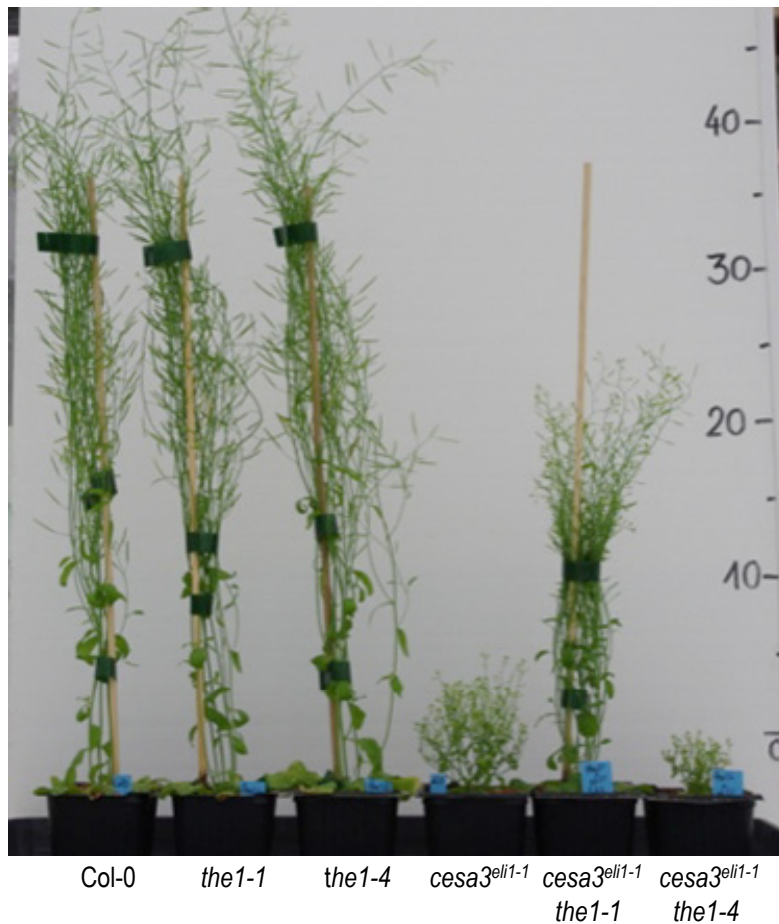

**Figure S3** Inflorescence phenotypes of loss- and gain-of-function alleles in combination with cellulose deficient backgrounds.

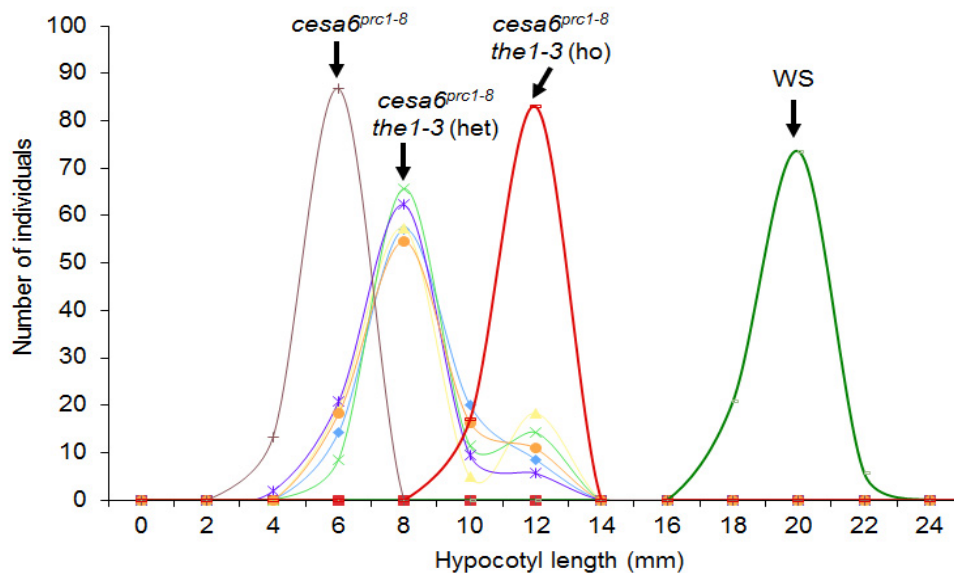

**Figure S4** Semidominance of *the1-3* in combination with *cesa6<sup>prc1-8</sup>*. Seedlings were cultivated on MS medium without sucrose for 7 days in the dark. Data represent frequency distributions of hypocotyl lengths. All seedlings except wild type (WS) were homozygous for *cesa6<sup>prc1-8</sup>* and either wild type, heterozygous (het) or homozygous (ho) for *the1-3*.
